# Supplementary material
Source: PubMed Central journal article supplement (PMC6640359)
Supplement: MPP-12-479-s003.pdf [file MPP-12-479-s003.pdf]

**Supplementary Table 1.** Primers used in this study

| Name            | Sequence (5'→3')                             |
|-----------------|----------------------------------------------|
| <i>PHNA</i> F1  | AAGCTCCCTCCTGTCTCTTTC                        |
| <i>PHNA</i> R1  | TCGATTTCTGACAGATCGGCT                        |
| <i>PHNB</i> F2  | ATTCTGGAAGGGCGAAGATTG                        |
| <i>PHNB</i> R2  | GACAAAAACCGGTCCATTTTGTG                      |
| <i>RGSA</i> F3  | GAATTCACGCTCGACTCGCAA                        |
| <i>RGSA</i> R3  | GCGAATCGTTCATGAGTTCATAGAG                    |
| <i>RGSB</i> F4  | GTCCTTATTGGTACTCCCGAAGCA                     |
| <i>RGSB</i> R4  | TATCCTGTCGCGCAACGGTATG                       |
| <i>RGSC1</i> F5 | CTCGTTAGACGAAGGCTCTTTC                       |
| <i>RGSC1</i> R5 | GAGATTCGTTATCATTGCCTGAGAAG                   |
| <i>RGSC2</i> F6 | TGTTGAGGTCGATCCTCGAGA                        |
| <i>RGSC2</i> R6 | CTGAGCGGCCTTATTGGCTATGA                      |
| <i>FLBA1</i> F7 | ATCTGGAACGAGATGTCAAGACCG                     |
| <i>FLBA1</i> R7 | ATGTTGACGGCTTCTCGAAGGT                       |
| <i>FLBA2</i> F8 | CGTATCGTCACAACCACCACAA                       |
| <i>FLBA1</i> R8 | TGGAGGCGAGGTTAGCCAATT                        |
| <i>TUB2</i> F1  | GAGCCGTCCTCGTCGACC                           |
| <i>TUB2</i> R31 | GAGCTCCTGGATAGAAGTGG                         |
| LFRgsB/for      | CCTAATGTCGACTTCTCCGG                         |
| LFRgsB/rev      | TCACTGGCCGTCGTTTTACAACATCTGGGATTAGCTTATTATC  |
| rfRgsb/for      | CATGGTCATAGCTGTTTCCTGGAGCTTGACTTTTGGTTCCG    |
| rfRgsb/rev      | CCATGGCGTGAACAGAAGTGG                        |
| LFRgsBn/for     | GGACATTCTCAAGGACAAGTGG                       |
| rfRgsbn/rev     | CCACCTACGCTCAATTCGAC                         |
| LFRgsC1/for     | GGGATGGAGGTCGAAGCTC                          |
| LFRgsC1/rev     | TCACTGGCCGTCGTTTTACAACATTTGGATGGACCCCTGTC    |
| RFRgsC1/for     | CATGGTCATAGCTGTTTCCTGCAAAGCACAGCACAGCGAG     |
| RFRgsC1/rev     | GATTGAACAGACCTGCCAAG                         |
| LFRgsC1n/for    | GCCAATGCTTAGCTCCTCAC                         |
| RFRgsC1n/rev    | CAGAGCCATCTTTCGAAGTC                         |
| LFFIbA1/for     | GCATAAGCGACACGAAATACAG                       |
| LFFIbA1/rev     | TCACTGGCCGTCGTTTTACAACGACGACTGTGTAATTGTTCCC  |
| RFFIbA1/for     | CATGGTCATAGCTGTTTCCTGGTGGGAATTACCCTGTCGTCATC |

|              |                                            |
|--------------|--------------------------------------------|
| RFFIbA1/rev  | GTTGTGTTGGGTTGGGCTGC                       |
| LFFIbA1n/for | GGCGATGATGCGTTTAGATG                       |
| RFFIbA1n/rev | GACTGGGACTGACTGGCGAT                       |
| LFFIbA2/for  | GCCCCTGTTGCTTAAAGTAC                       |
| LFFIbA2/rev  | TCACTGGCCGTCGTTTTACAAGGATAGGGATTAGGGATTGGC |
| RFFIbA2/for  | CATGGTCATAGCTGTTTCCTGGACTGCACTAGGAAGGGCTG  |
| RFFIbA2/rev  | CAAACCTCCTCACCAGCCATAC                     |
| LFFIbA2n/for | CATACATACCGCAACTAACAAC                     |
| RFFIbA2n/rev | CGACAAAATCCATCAGAGAGAC                     |
| tTrpF        | CTAGAAGTCCTCGTGTACTGTG                     |
| OEFIbA2/rev  | TGTTGCGACTGAGTGGCCATGGGTGATGGTCTGCTC       |
| OEFIbA2/for  | GAGCAGACCATCACCCATGGCCACTCAGTCGCAACA       |
| OEFIbA2/rev  | GTGCAGTCTGAGGTCAAATCCC                     |
| OERgsBfor    | CCAGCTGCTCTTTTCTTTTCTACATGGCCGAAC          |
| OERgsBrev    | ATTAGCCCTACGTCCGTACA                       |
| A2revsc      | GGCTCTGCTGTGGATGATAAGG                     |
| gpdAF-scrn   | CCAAATATCGTGCCTCTCCTGC                     |

---
